# Supplementary material for: An eco-friendly way to fire retardant flexible polyurethane foam: layer-by-layer assembly of fully bio-based substances
Source: Royal Society of Chemistry journal article supplement (doi:10.1039/c4ra07972h), 2014-01-01
Supplement: c4ra07972h1.pdf [file c4ra07972h1.pdf]

## **Supporting Information for**

# **An Eco-friendly Way to Fire Retardant Flexible Polyurethane Foam: Layer-by-Layer Assembly of Fully Bio-based Substance**

Xin Wang, Ye-Tang Pan, Jin-Tao Wan, De-Yi Wang\*

*Madrid Institute for Advanced Studies of Materials (IMDEA Materials), C/Eric  
Kandel, 2, 28906 Getafe, Madrid, Spain*

\* Tel.: +34 915493422-1055. Fax: +34 915503047. E-mail: [deyi.wang@imdea.org](mailto:deyi.wang@imdea.org).

The flame retardant properties of the treated PUFs are evaluated by horizontal flame tests, as shown in Figure S1. As can be seen, un-coated PUF vigorously and completely burn. After PUF is coated by CS and AL, the sample starts to burn very slowly and extinguish at 105 s and 67 s for PUF-5 BL and PUF-10 BL, respectively. Additionally, the presence of CS-AL coating inhibits the dripping of PUF.

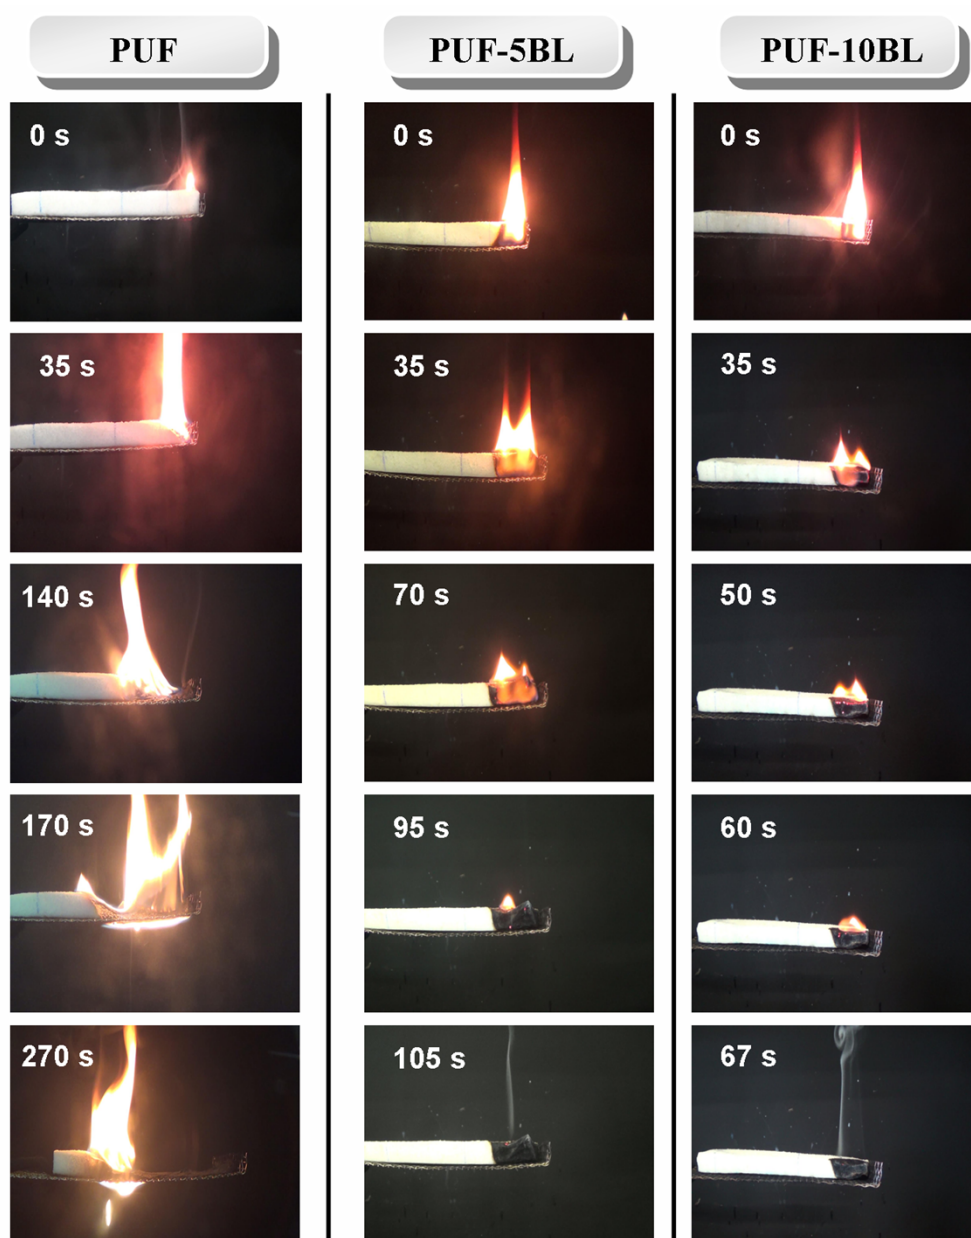

**Figure S1.** Snapshots showing horizontal burning tests of PUF, PUF-5BL and PUF-10BL
